# Supplementary material
Source: publisher figshare collection journal article supplement (https://gsajournals.figshare.com/ndownloader/files/28236570)
Supplement: Supplementary file 1 [file 28236570]

Table S1 CRISPR-Cas9 deletion alleles and associated sequences

| **Strain** | **Allele** | **Gene Target** | **Phenotype** | **Fails to Complement** | **Guide RNA Sequence #1** | **Guide RNA Sequence #2** | **Left Flanking Sequence**  **(30 bp)** | **Right Flanking Sequence**  **(30 bp)** |
| --- | --- | --- | --- | --- | --- | --- | --- | --- |
| VC4612 | gk5682 | C34D4.4 | unfertilized oocytes laid | GE2840, GE2890 | GCATACCGTACTTTTCCCGG | GTGGTGGTTGTTGAGCACGG | AAAAGCGAAAATTTCCGGAGCGTTCCCCCG | TGCTCAACAACCACCACAAGAATATCAAAA |
| VC4606 | gk5676 | F56D5.2 | unfertilized oocytes laid | GE2837 | TATTTCAGGACACCACGGAA | GAAGGTTCACTCAGTCTGAT | TACAGTGGAAAATATTTCAGGACACCACGG | ATTGGTTCAAAAGTGGCGGTACGAGTCGCT |
| VC4645 | gk5714 | nstp-2 | exploded through vulva or bagged with few late-stage dead embryos | GE2091, GE2288 | CTTCTTCTCATCTTGCTTGT | GAAATGTAGAAAATGTCATC | TATCTACTGTTTCTTCTTCTCATCTTGCTT | TCAGGTTCATGGCAGATGGCTCTTGTCTGT |
